# Supplementary material for: Interactions between ZnO Nanoparticles and Polyphenols Affect Biological Responses
Source: MDPI journal article supplement (doi:10.3390/nano12193337), 2022-09-25
Supplement: s1 [file s1]

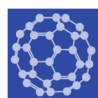

Supplementary Materials

# Interactions between ZnO Nanoparticles and Polyphenols Affect Biological Responses

Su-Bin Kim, Na-Kyung Yoo and Soo-Jin Choi \*

Division of Applied Food System, Major of Food Science & Technology, Seoul Women's University, Seoul 01797, Korea

\* Correspondence: sjchoi@swu.ac.kr; Tel.: +82-2-970-5634

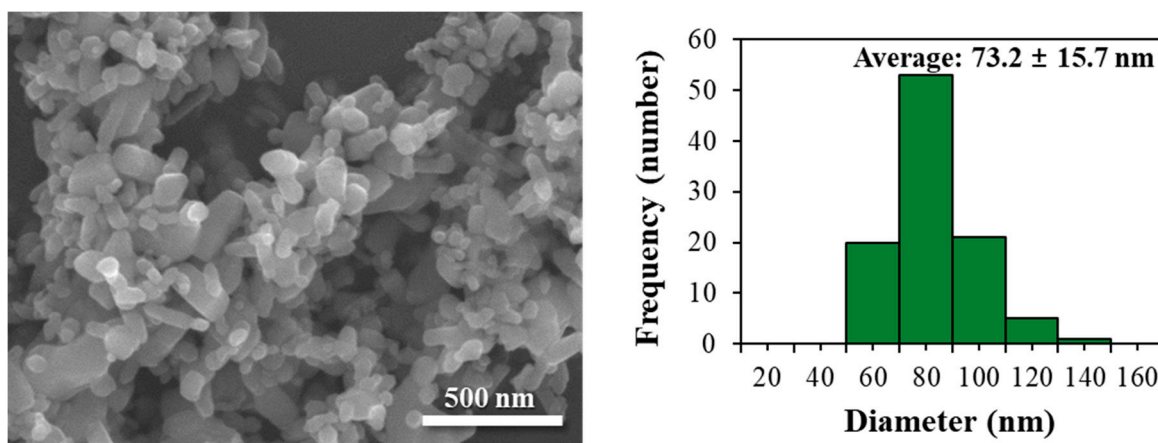

**Figure S1.** Scanning electron microscopy (SEM) images and size distributions of ZnO NPs. Particle size distributions were determined by randomly selecting 100 particles from SEM images.

**Table S1.** Composition of simulated digestion fluids of the in vitro digestion model.

| Digestion fluids | pH      | Composition (amounts based on 1 L of digestion juices)                                                                                                                                                                                                                                 |
|------------------|---------|----------------------------------------------------------------------------------------------------------------------------------------------------------------------------------------------------------------------------------------------------------------------------------------|
| Saliva           | 6.8±0.1 | KCl (896 mg), KSCN (200 mg), NaH <sub>2</sub> PO <sub>4</sub> ·2H <sub>2</sub> O (1110.3 mg), Na <sub>2</sub> SO <sub>4</sub> (570 mg), NaCl (298 mg), NaHCO <sub>3</sub> (1694 mg), urea (200 mg), α-amylase (290 mg), uric acid (15 mg), mucin (25 mg)                               |
| Gastric juice    | 1.3±0.1 | NaCl (2752 mg), NaH <sub>2</sub> PO <sub>4</sub> ·2H <sub>2</sub> O (332.8 mg), KCl (824 mg), CaCl <sub>2</sub> ·2H <sub>2</sub> O (400 mg), urea (85 mg), D-(+)-glucose (650 mg), glucuronic acid (20 mg), glucosamine hydrochloride (330 mg), BSA (1 g), pepsin (2.5 g), mucin (3 g) |
| Duodenal juice   | 8.1±0.1 | NaCl (7012 mg), NaHCO <sub>3</sub> (3388 mg), KH <sub>2</sub> PO <sub>4</sub> (80 mg), KCl (564 mg), MgCl <sub>2</sub> (22.7 mg), 37% HCl (180 µL), urea (100 mg), BSA (1 g), pancreatin (9 g), lipase (1.5 g), CaCl <sub>2</sub> ·2H <sub>2</sub> O (200 mg)                          |
| Bile juice       | 8.2±0.1 | NaCl (5259 mg), NaHCO <sub>3</sub> (5785 mg), KCl (376 mg), 37% HCl (150 µL), urea (250 mg), BSA (1.8 g), bile (30 g), CaCl <sub>2</sub> ·2H <sub>2</sub> O (222 mg)                                                                                                                   |
